# Supplementary material
Source: publisher site journal article supplement (https://www.dovepress.com/article/324206)
Supplement: Supplementary file 4 [file get_supplementary_file.php]

**Table S1.** Composition of sildenafil base-loaded amorphous microspheres.

| Formulation    | F1    | F2   | F3  | F4 | F5  | F6 | F7 | F8 |
|----------------|-------|------|-----|----|-----|----|----|----|
| Sildenafil (g) |       |      |     |    | 1   |    |    |    |
| Labrasol (mL)  | 0.125 | 0.25 | 0.5 | 1  | 1   | 1  | 1  | 1  |
| PVP (g)        | 1     | 1    | 1   | 1  | 2   | 4  | 6  | 8  |
| Ethanol (mL)   |       |      |     |    | 200 |    |    |    |
