# Supplementary material
Source: publisher site journal article supplement (https://www.dovepress.com/article/324206)
Supplement: Supplementary file 6 [file get_supplementary_file.php]

## FIGURE LEGENDS

**Fig. S1.** Experimental design of liquid SNEDDS formulations.

**Fig. S2.** Solubility results of sildenafil in 1% polymer (A), and 5% surfactant (B). Each value represents the mean  $\pm$  S.D. (n = 3).

**Fig. S3.** Aqueous solubility (A) and dissolution (B) of sildenafil in the various microspheres formulations. Each value represents the mean  $\pm$  S.D. (n=3). # means  $p < 0.05$  compared to sildenafil powder, F1, F2 and F3. \* means  $p < 0.05$  compared to sildenafil powder, F1, F2, F3 and F4. \*\* means  $p < 0.05$  compared to sildenafil powder, F1, F2, F3, F4, F5 and F6.

**Fig. S4.** Solubility results of sildenafil in oil samples. Each value represents the mean  $\pm$  S.D. (n = 3).
