# Supplementary material
Source: publisher site journal article supplement (https://www.dovepress.com/article/324206)

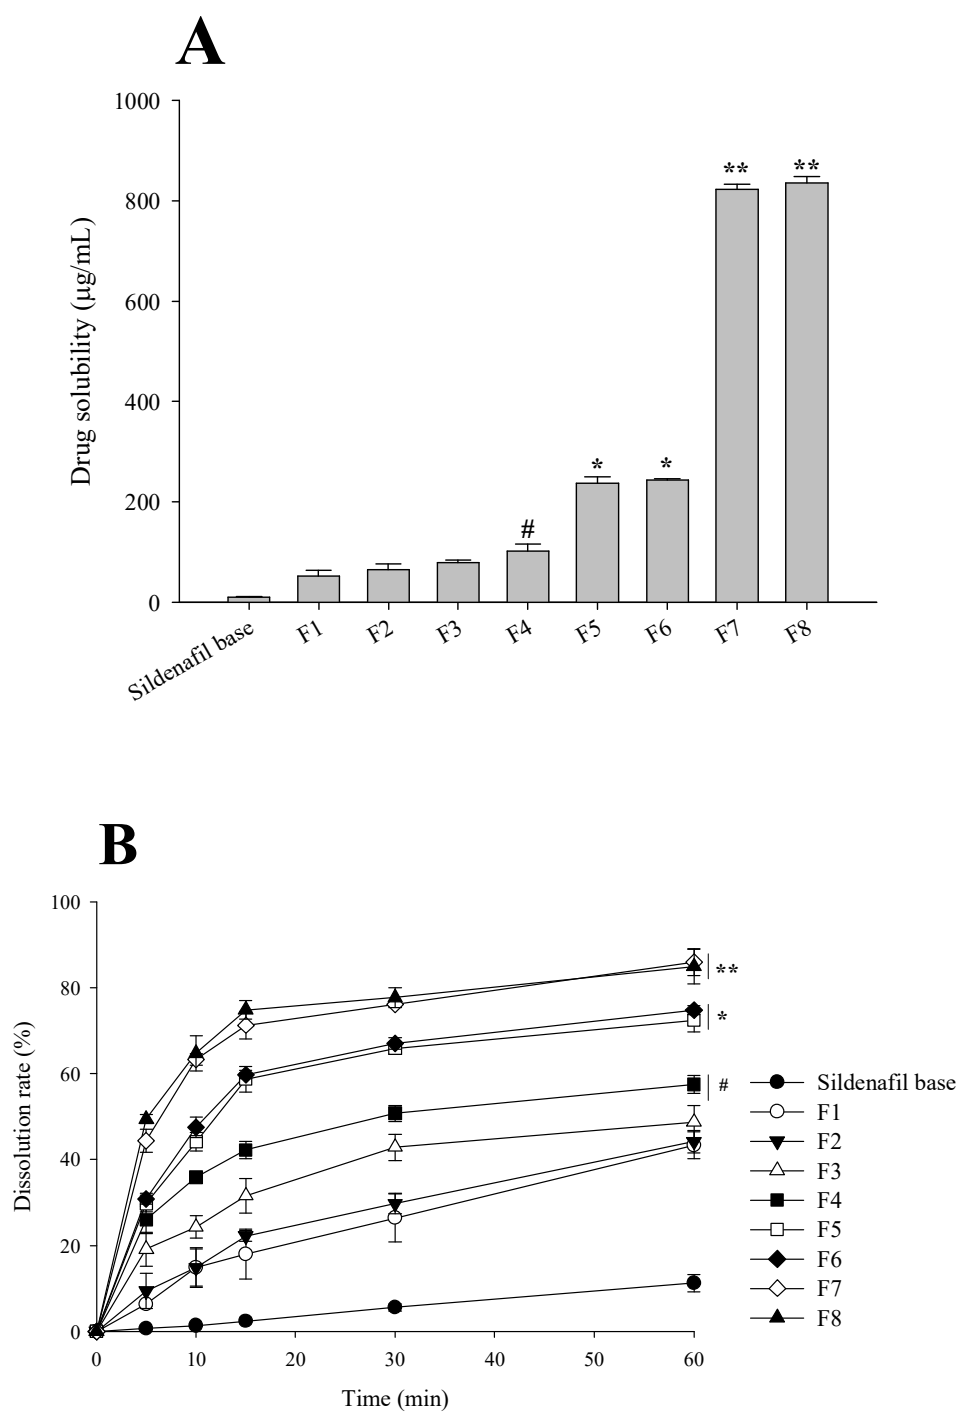

**Fig. S3**

Supplement: Supplementary file 1 [file get_supplementary_file.php]

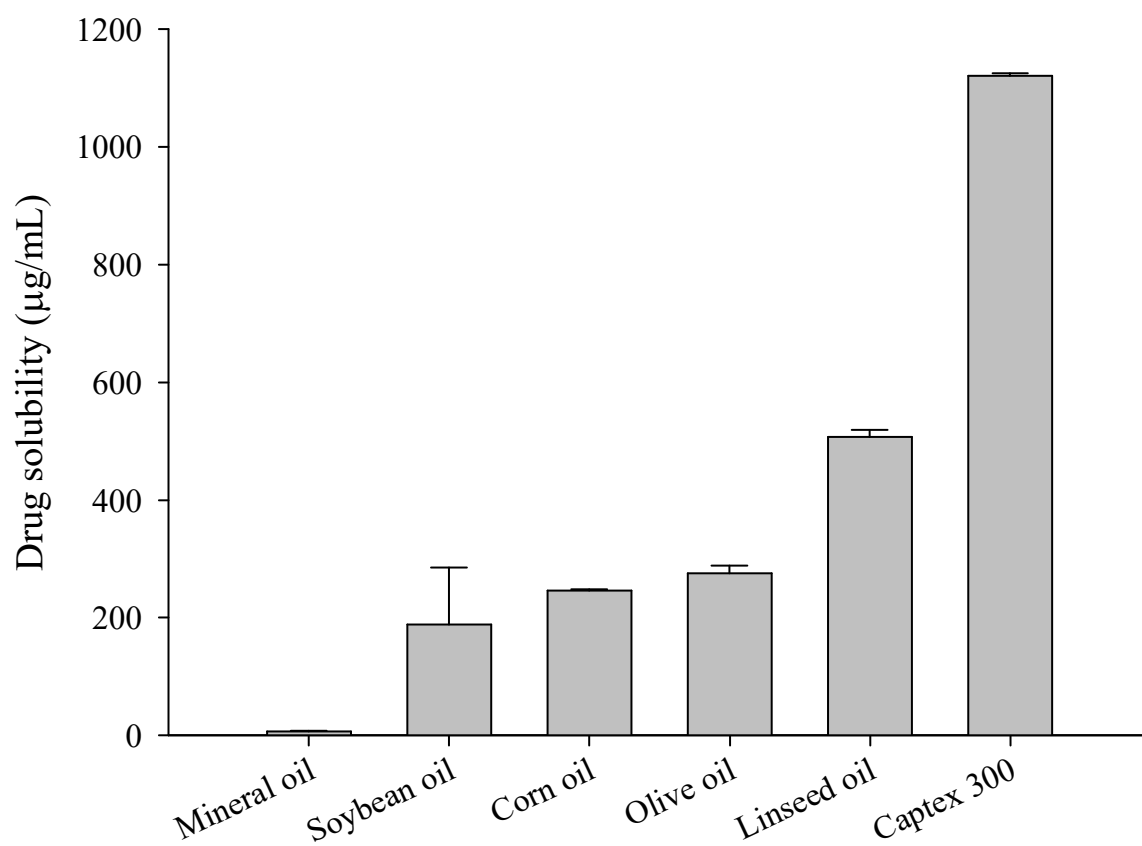

**Fig. S4**

Supplement: Supplementary file 2 [file get_supplementary_file.php]

Oil : Captex 300

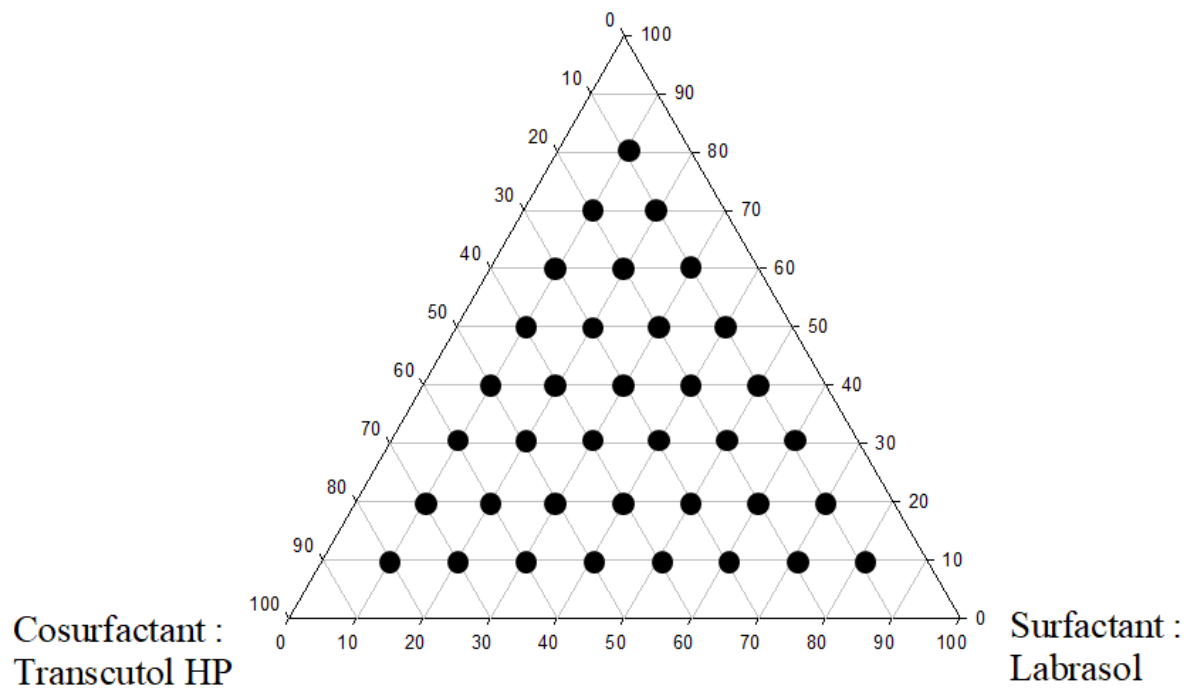

**Fig. S1**

Supplement: Supplementary file 3 [file get_supplementary_file.php]

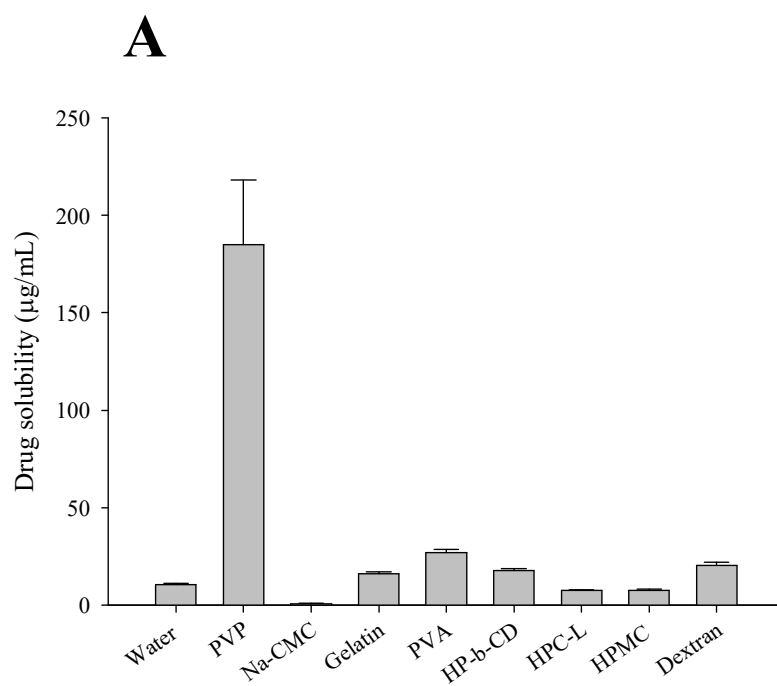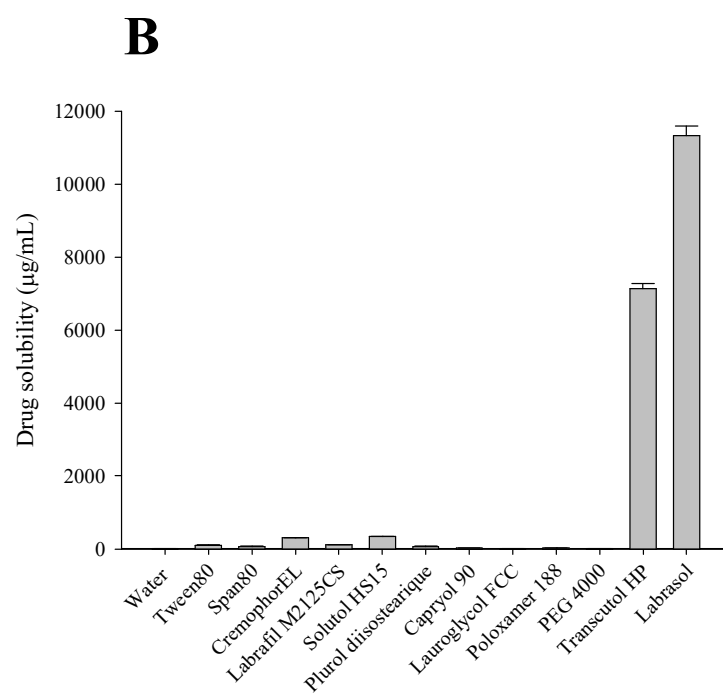

**Fig. S2**

Supplement: Supplementary file 5 [file get_supplementary_file.php]
